# Supplementary material
Source: PubMed Central journal article supplement (PMC4516676)
Supplement: NIHMS695736-supplement-1.pdf [file NIHMS695736-supplement-1.pdf]

**Supplemental Table S1. Cx43 phosphorylation in NP-UAEC with VEGF-165, VEGF-E or PIGF and without or with VEGFR kinase inhibitor (VEGFRi).<sup>1</sup>**

|                        | Control |            | VEGF-165   |             | VEGF E     |             | PIGF                   |             |
|------------------------|---------|------------|------------|-------------|------------|-------------|------------------------|-------------|
|                        | -VEGFRi | +VEGFRi    | -VEGFRi    | +VEGFRi     | -VEGFRi    | +VEGFRi     | -VEGFRi                | +VEGFRi     |
| <b>Ser-279</b>         |         |            |            |             |            |             |                        |             |
| 46 kDa                 | 1.00    | 1.15±0.06+ | 1.26±0.08* | 1.00±0.06+# | 1.26±0.10* | 0.97±0.06+# | 0.95±0.11 <sup>§</sup> | 1.00±0.09   |
| <b>Tyr-265</b>         |         |            |            |             |            |             |                        |             |
| 82-78 kDa              | 1.00    | 0.98±0.09  | 1.13±0.02* | 0.91±0.08+  | 0.97±0.10  | 0.90±0.08   | 0.91±0.09              | 0.76±0.06*  |
| 82 kDa                 | 1.00    | 0.96±0.07  | 1.07±0.08  | 0.91±0.10   | 0.96±0.11  | 0.96±0.14   | 0.92±0.12              | 0.74±0.07*  |
| 80 kDa                 | 1.00    | 0.93±0.08  | 1.11±0.07  | 0.88±0.09+  | 0.98±0.13  | 0.90±0.12   | 0.92±0.11              | 0.74±0.06*  |
| 78 kDa                 | 1.00    | 1.02±0.07  | 1.12±0.10  | 0.96±0.07+  | 0.95±0.10  | 0.95±0.11   | 0.94±0.09              | 0.79±0.05*  |
| 46 kDa                 | 1.00    | 0.84±0.08  | 0.91±0.06  | 0.88±0.07   | 0.95±1.10  | 0.86±0.10   | 0.85±0.13              | 0.79±0.05   |
| 42 kDa                 | 1.00    | 0.90±0.08  | 0.96±0.09  | 0.93±0.09   | 0.98±0.14  | 0.90±0.15   | 0.82±0.17              | 0.81±0.11   |
| <b>Ser-368</b>         |         |            |            |             |            |             |                        |             |
| 46 kDa                 | 1.00    | 1.00±0.06  | 1.04±0.08  | 0.82±0.07*+ | 0.95±0.05  | 0.90±0.04*  | 0.96±0.03              | 0.84±0.03*+ |
| 42 kDa <sup>2</sup>    | 1.00    | 0.88±0.04+ | 1.00±0.07  | 0.77±0.09*  | 0.91±0.06  | 0.83±0.10   | 0.90±0.06              | 0.67±0.06*+ |
| <b>Ser-262</b>         |         |            |            |             |            |             |                        |             |
| All bands              | 1.00    | 1.03±0.07  | 1.03±0.08  | 0.98±0.06   | 1.01±0.05  | 0.92±0.05   | 1.01±0.04              | 0.99±0.04   |
| 42-46 kDa              | 1.00    | 1.03±0.12  | 1.02±0.09  | 0.95±0.09   | 0.97±0.08  | 0.92±0.08   | 1.02±0.06              | 0.97±0.12   |
| 46 kDa                 | 1.00    | 1.06±0.11  | 1.05±0.06  | 1.01±0.08   | 0.99±0.07  | 1.00±0.09   | 1.05±0.05              | 1.05±0.12   |
| 44 kDa                 | 1.00    | 0.99±0.15  | 0.89±0.11  | 0.89±0.08   | 0.95±0.09  | 0.86±0.08   | 0.89±0.07              | 0.92±0.16   |
| 42 kDa                 | 1.00    | 1.09±0.09  | 0.99±0.13  | 0.95±0.08   | 0.97±0.09  | 0.86±0.06*  | 0.97±0.13              | 0.88±0.12   |
| 36 kDa                 | 1.00    | 1.05±0.06  | 1.02±0.08  | 0.98±0.04   | 1.00±0.06  | 0.84±0.06*  | 0.99±0.08              | 0.87±0.10   |
| 32 kDa                 | 1.00    | 0.99±0.06  | 1.44±0.10* | 1.12±0.13+  | 1.33±0.12* | 1.20±0.10*  | 1.05±0.13 <sup>§</sup> | 1.05±0.12   |
| 28 kDa                 | 1.00    | 1.08±0.06  | 1.03±0.08  | 1.12±0.05   | 1.07±0.09  | 0.98±0.06   | 0.97±0.19              | 1.02±0.05   |
| <b>Total Cx43</b>      |         |            |            |             |            |             |                        |             |
| All bands              | 1.00    | 1.13±0.03+ | 1.14±0.04* | 1.03±0.03+  | 1.11±0.03* | 1.11±0.04*  | 1.17±0.05*#            | 1.02±0.10   |
| 46-47 kDa              | 1.00    | 1.13±0.05+ | 1.17±0.03* | 1.11±0.05*  | 1.18±0.05* | 1.16±0.07*  | 1.22±0.06*#            | 1.09±0.12   |
| 42-43 kDa              | 1.00    | 1.13±0.03+ | 1.11±0.06  | 0.98±0.03   | 1.08±0.03* | 1.06±0.04   | 1.16±0.08              | 1.01±0.11   |
| <b>CT1<sup>3</sup></b> |         |            |            |             |            |             |                        |             |
| 42-43 kDa              | 1.00    | 1.06±0.05  | 1.01±0.02  | 1.04±0.05   | 1.05±0.03  | 1.00±0.04   | 1.06±0.03              | 0.99±0.04   |

<sup>1</sup>Values shown are Means ± S.E.M. for 5–6 independent experiments (for the 28 kDa band of s262, n=3). Following frequently used nomenclature, 42 kDa=P0, 43 kDa=P1, 46 kDa=P2; 47 kDa=P3. Because some bands were difficult to measure separately due to their proximity, they were measured together.

<sup>2</sup>This band increases with alkaline phosphatase treatment.

<sup>3</sup>CT1 antibody recognizes Cx43 when Ser-365 is not phosphorylated.

\* P<0.05 compared with control, + P<0.05 compared with same stimulated without inhibitor. # P<0.05 compared with P-UAEC, <sup>§</sup>P<0.05 compared with VEGF165.

**Supplemental Table S2. Cx43 phosphorylation in P-UAEC with VEGF-165, VEGF-E or PIGF and without or with VEGFR kinase inhibitor (VEGFRi)<sup>1</sup>**

|                        | Control |            | VEGF-165   |             | VEGF E     |             | PIGF                   |                        |
|------------------------|---------|------------|------------|-------------|------------|-------------|------------------------|------------------------|
|                        | -VEGFRi | +VEGFRi    | -VEGFRi    | +VEGFRi     | -VEGFRi    | +VEGFRi     | -VEGFRi                | +VEGFRi                |
| <b>Ser-279</b>         |         |            |            |             |            |             |                        |                        |
| 46 kDa                 | 1.00    | 0.96±0.10  | 1.41±0.07* | 1.35±0.11*# | 1.51±0.14* | 1.50±0.14*# | 1.06±0.08 <sup>§</sup> | 0.97±0.17 <sup>§</sup> |
| <b>Tyr-265</b>         |         |            |            |             |            |             |                        |                        |
| 82-78 kDa              | 1.00    | 1.05±0.07  | 1.26±0.12* | 1.13±0.12+  | 1.26±0.11* | 1.10±0.11+  | 1.18±0.12              | 1.11±0.11              |
| 82 kDa                 | 1.00    | 1.05±0.15  | 1.26±0.19  | 1.24±0.21   | 1.26±0.18  | 1.13±0.20   | 1.13±0.18              | 1.18±0.18              |
| 80 kDa                 | 1.00    | 0.94±0.09  | 1.19±0.14  | 1.08±0.15   | 1.18±0.13  | 1.00±0.12+  | 1.02±0.10              | 0.99±0.09              |
| 78 kDa                 | 1.00    | 0.95±0.09  | 1.05±0.10  | 1.06±0.16   | 1.17±0.14  | 1.00±0.11+  | 1.04±0.10              | 0.99±0.10              |
| 46 kDa                 | 1.00    | 0.80±0.07+ | 0.93±0.07  | 0.85±0.07   | 0.95±0.10  | 0.79±0.08   | 0.89±0.08              | 0.90±0.08              |
| 42 kDa                 | 1.00    | 0.78±0.10+ | 0.92±0.09  | 0.76±0.10   | 0.88±0.11  | 0.71±0.08   | 0.77±0.13              | 0.72±0.09              |
| <b>Ser-368</b>         |         |            |            |             |            |             |                        |                        |
| 46 kDa                 | 1.00    | 0.94±0.06  | 0.95±0.07  | 0.92±0.06   | 0.94±0.06  | 0.96±0.11   | 0.98±0.08              | 0.92±0.06              |
| 42 kDa <sup>2</sup>    | 1.00±   | 1.08±0.10  | 1.23±0.15  | 1.00±0.17   | 1.22±0.16  | 1.03±0.11   | 1.04±0.15              | 0.88±0.15              |
| <b>Ser-262</b>         |         |            |            |             |            |             |                        |                        |
| All bands              | 1.00    | 1.04±0.07  | 1.06±0.07  | 1.06±0.06   | 1.14±0.11  | 1.13±0.11   | 1.04±0.06              | 1.09±0.10              |
| 42-46 kDa              | 1.00    | 1.04±0.09  | 1.07±0.07  | 1.06±0.06   | 1.06±0.10  | 1.06±0.11   | 1.06±0.05              | 1.10±0.10              |
| 46 kDa                 | 1.00    | 1.00±0.07  | 1.06±0.05  | 1.09±0.03   | 1.05±0.07  | 1.07±0.06   | 1.11±0.03*             | 1.13±0.05*             |
| 44 kDa                 | 1.00    | 1.01±0.10  | 1.09±0.11  | 1.07±0.09   | 1.02±0.12  | 0.98±0.18   | 1.05±0.11              | 1.08±0.16              |
| 42 kDa                 | 1.00    | 1.07±0.14  | 1.05±0.12  | 1.09±0.10   | 1.10±0.15  | 1.07±0.20   | 1.04±0.11              | 1.16±0.18              |
| 36 kDa                 | 1.00    | 1.00±0.07  | 1.00±0.06  | 0.99±0.05   | 1.04±0.10  | 1.07±0.10   | 0.96±0.07              | 0.98±0.07              |
| 32 kDa                 | 1.00    | 0.99±0.12  | 1.40±0.08* | 1.39±0.18*  | 1.66±0.23* | 1.57±0.24*  | 1.27±0.12*             | 1.18±0.11              |
| 28 kDa                 | 1.00    | 1.15±0.13  | 1.10±0.14  | 1.05±0.16   | 1.09±0.14  | 1.05±0.13   | 0.87±0.05              | 0.96±0.09              |
| <b>Total Cx43</b>      |         |            |            |             |            |             |                        |                        |
| All bands              | 1.00    | 1.07±0.06  | 1.12±0.08  | 0.93±0.07   | 1.05±0.07  | 1.03±0.07   | 0.99±0.06#             | 1.00±0.09              |
| 46-47 kDa              | 1.00    | 1.04±0.03  | 1.14±0.06* | 1.04±0.08   | 1.09±0.06  | 1.04±0.04   | 1.01±0.05#             | 0.99±0.09              |
| 42-43 kDa              | 1.00    | 1.12±0.11  | 1.11±0.12  | 0.88±0.08   | 1.03±0.09  | 1.01±0.09   | 1.00±0.10              | 1.01±0.09              |
| <b>CT1<sup>3</sup></b> |         |            |            |             |            |             |                        |                        |
| 42-43 kDa              | 1.00    | 1.01±0.06  | 1.08±0.06  | 1.08±0.08   | 1.02±0.04  | 0.97±0.07   | 1.08±0.07              | 1.00±0.08              |

<sup>1</sup>Values shown are Means ± S.E.M for 5–6 independent experiments (for the 28 kDa band of Ser-262, n=3). Following frequently used nomenclature, 42 kDa=P0, 43 kDa=P1, 46 kDa=P2; 47 kDa=P3. Because some bands were difficult to measure separately due to their proximity, they were measured together.

<sup>2</sup>This band increases with alkaline phosphatase treatment.

<sup>3</sup>CT1 antibody recognizes Cx43 when Ser-365 is not phosphorylated.

\* P<0.05 compared with control, + P<0.05 compared with same stimulated without inhibitor. # P<0.05 compared with NP-UAEC, § P<0.05 compared with VEGF 165.

**Supplemental Table S3. Cx43 phosphorylation in NP-UAEC with PMA, ATP or VEGF-165 and without or with U0126<sup>1</sup>**

|                     | Control |            | PMA         |             | ATP        |            | VEGF-165   |             |
|---------------------|---------|------------|-------------|-------------|------------|------------|------------|-------------|
|                     | -U0126  | +U0126     | -U0126      | +U0126      | -U0126     | +U0126     | -U0126     | +U0126      |
| <b>Ser-279</b>      |         |            |             |             |            |            |            |             |
| 46 kDa              | 1.00    | 1.08±0.08  | 2.14±0.10*# | 0.94±0.10+  | 0.89±0.08  | 0.93±0.06  | 1.19±0.04* | 0.95±0.05+  |
| <b>Tyr-265</b>      |         |            |             |             |            |            |            |             |
| 82–78 kDa           | 1.00    | 1.14±0.06+ | 1.40±0.04*  | 1.44±0.07*  | 1.14±0.10  | 1.19±0.09  | 1.14±0.08* | 1.09±0.07   |
| 82 kDa              | 1.00    | 1.10±0.09  | 1.77±0.20*  | 1.47±0.19*  | 1.14±0.11  | 1.14±0.14  | 1.20±0.12  | 1.04±0.11   |
| 80 kDa              | 1.00    | 1.14±0.05+ | 1.51±0.08*  | 1.56±0.08*  | 1.13±0.09  | 1.17±0.10  | 1.15±0.10  | 1.11±0.06   |
| 78 kDa              | 1.00    | 1.12±0.06  | 1.01±0.09   | 1.28±0.09*  | 1.15±0.12  | 1.21±0.11  | 1.15±0.10  | 1.12±0.07   |
| 46 kDa              | 1.00    | 1.02±0.06  | 1.06±0.08   | 0.98±0.07   | 0.96±0.12  | 1.00±0.10  | 1.04±0.10  | 1.05±0.07   |
| <b>Ser-368</b>      |         |            |             |             |            |            |            |             |
| 46 kDa              | 1.00    | 1.11±0.06  | 1.56±0.11*  | 1.37±0.09*  | 1.03±0.08  | 1.00±0.11  | 1.24±0.15  | 1.05±0.10   |
| 42 kDa <sup>2</sup> | 1.00    | 1.00±0.05  | 3.04±0.19*  | 2.80±0.18*  | 1.45±0.09* | 1.21±0.11  | 1.29±0.15* | 1.09±0.18   |
| <b>Ser-262</b>      |         |            |             |             |            |            |            |             |
| All bands           | 1.00    | 0.83±0.11  | 1.40±0.10*  | 1.04±0.05+  | 0.98±0.06  | 0.92±0.07  | 1.06±0.05  | 0.89±0.07   |
| 44–46 kDa           | 1.00    | 0.80±0.08+ | 1.08±0.04   | 0.90±0.07   | 0.92±0.07  | 0.95±0.06  | 1.00±0.04  | 0.96±0.06   |
| 46 kDa              | 1.00    | 0.85±0.08  | 1.06±0.04   | 0.89±0.07   | 0.91±0.05  | 0.94±0.05  | 0.99±0.05  | 1.01±0.07   |
| 45 kDa              | 1.00    | 0.78±0.08+ | 1.09±0.04   | 0.92±0.08   | 0.95±0.07  | 0.97±0.06  | 1.04±0.04  | 0.94±0.06   |
| 44 kDa              | 1.00    | 0.83±0.13  | 1.19±0.09*  | 0.94±0.12   | 0.94±0.13  | 0.95±0.12  | 0.97±0.04  | 0.96±0.11   |
| 36 kDa              | 1.00    | 0.78±0.05+ | 1.01±0.08   | 0.95±0.13   | 0.80±0.06* | 0.85±0.04* | 0.91±0.12  | 0.97±0.08   |
| 32 kDa              | 1.00    | 0.60±0.12+ | 1.38±0.17*  | 0.66±0.09*+ | 1.16±0.12  | 0.86±0.10  | 1.02±0.08  | 0.70±0.11*+ |
| 28 kDa              | 1.00    | 0.89±0.09  | 2.18±0.32*  | 2.06±0.32*  | 0.89±0.09  | 0.85±0.12  | 1.07±0.09  | 0.97±0.16   |
| <b>Total Cx43</b>   |         |            |             |             |            |            |            |             |
| All bands           | 1.00    | 0.98±0.06  | 1.10±0.07   | 1.03±0.07+  | 1.16±0.07* | 1.11±0.07  | 1.08±0.06  | 0.98±0.06   |
| 46–47 kDa           | 1.00    | 0.95±0.06  | 1.78±0.19*  | 1.20±0.08*+ | 1.18±0.11  | 1.10±0.08  | 1.26±0.12* | 1.08±0.08   |
| 42–43 kDa           | 1.00    | 1.00±0.06  | 0.88±0.06*  | 0.99±0.07+  | 1.18±0.07  | 1.15±0.07  | 1.04±0.06  | 0.98±0.05   |

<sup>1</sup>Values shown are Means ± S.E.M for 5–6 independent experiments. Following frequently used nomenclature, 42 kDa=P0, 43 kDa=P1, 46 kDa=P2; 47 kDa=P3. Because some bands were difficult to measure separately due to their proximity, they were measured together.

<sup>2</sup>This band increases with alkaline phosphatase treatment.

\*P<0.05 compared with control, +P<0.05 compared with same stimulated without inhibitor. #P<0.05 compared with P-UAEC.

**Supplemental Table S4. Cx43 phosphorylation in P-UAEC with PMA, ATP or VEGF-165 and without or with U0126<sup>1</sup>**

|                     | Control |            | PMA         |             | ATP        |             | VEGF-165   |             |
|---------------------|---------|------------|-------------|-------------|------------|-------------|------------|-------------|
|                     | -U0126  | +U0126     | -U0126      | +U0126      | -U0126     | +U0126      | -U0126     | +U0126      |
| <b>Ser-279</b>      |         |            |             |             |            |             |            |             |
| 46 kDa              | 1.00    | 0.84±0.07  | 2.85±0.14*# | 0.93±0.09+  | 1.03±0.10  | 1.00±0.09   | 1.24±0.10* | 0.84±0.05*+ |
| <b>Tyr-265</b>      |         |            |             |             |            |             |            |             |
| 82–78 kDa           | 1.00    | 1.08±0.04  | 1.33±0.11*  | 1.41±0.13*  | 1.10±0.08* | 1.14±0.11*  | 1.19±0.06  | 1.20±0.06*  |
| 82 kDa              | 1.00    | 1.01±0.06  | 1.31±0.07*  | 1.28±0.08*  | 1.12±0.07  | 1.15±0.11   | 1.15±0.12  | 1.11±0.15   |
| 80 kDa              | 1.00    | 1.06±0.02+ | 1.48±0.11*  | 1.49±0.07*  | 1.07±0.04  | 1.15±0.11   | 1.07±0.10  | 1.06±0.16   |
| 78 kDa              | 1.00    | 1.07±0.02+ | 1.09±0.08   | 1.21±0.05*  | 1.04±0.05  | 1.15±0.13   | 1.04±0.11  | 1.09±0.19   |
| 46 kDa              | 1.00    | 1.12±0.06  | 1.09±0.07   | 1.10±0.06   | 1.12±0.06  | 1.12±0.10   | 1.23±0.14  | 1.10±0.14   |
| <b>Ser-368</b>      |         |            |             |             |            |             |            |             |
| 46 kDa              | 1.00    | 1.12±0.05* | 1.26±0.09*  | 1.12±0.05*+ | 0.95±0.07  | 0.92±0.09   | 1.01±0.14  | 0.86±0.15   |
| 42 kDa <sup>2</sup> | 1.00    | 1.21±0.06+ | 2.69±0.21*  | 2.60±0.25*  | 1.43±0.18* | 1.29±0.13*  | 1.26±0.23* | 1.15±0.18   |
| <b>Ser-262</b>      |         |            |             |             |            |             |            |             |
| All bands           | 1.00    | 1.00±0.04  | 1.32±0.12*  | 1.07±0.09+  | 1.14±0.10  | 1.17±0.09   | 1.19±0.11  | 0.91±0.08   |
| 44–46 kDa           | 1.00    | 1.17±0.09  | 1.37±0.16*  | 0.87±0.13+  | 1.01±0.12  | 1.26±0.11   | 0.99±0.05  | 0.82±0.09   |
| 46 kDa              | 1.00    | 1.19±0.10  | 1.28±0.15   | 0.87±0.12   | 1.03±0.12  | 1.22±0.13   | 1.06±0.12  | 0.83±0.12   |
| 45 kDa              | 1.00    | 1.17±0.12  | 1.42±0.18*  | 0.86±0.12+  | 0.94±0.06  | 1.32±0.13*+ | 1.11±0.15  | 0.83±0.07*  |
| 44 kDa              | 1.00    | 1.18±0.09  | 1.36±0.10*  | 1.07±0.20   | 1.01±0.10  | 1.25±0.13   | 0.93±0.08  | 0.77±0.07*  |
| 36 kDa              | 1.00    | 0.96±0.05  | 1.17±0.05*  | 0.96±0.15   | 0.93±0.06  | 1.05±0.04   | 1.11±0.10  | 0.85±0.07   |
| 32 kDa              | 1.00    | 0.76±0.15  | 1.75±0.12*  | 0.89±0.12+  | 1.15±0.04  | 1.09±0.17   | 1.48±0.18* | 1.04±0.14+  |
| 28 kDa              | 1.00    | 1.07±0.17  | 2.21±0.34*  | 2.23±0.70*  | 1.13±0.24  | 0.86±0.16   | 1.09±0.17  | 0.95±0.04   |
| <b>Total Cx43</b>   |         |            |             |             |            |             |            |             |
| All bands           | 1.00    | 0.98±0.05  | 1.10±0.04*  | 1.06±0.03   | 1.21±0.06* | 1.15±0.05*  | 1.21±0.11  | 0.98±0.07   |
| 46–47 kDa           | 1.00    | 0.98±0.05  | 1.44±0.08*  | 1.11±0.05*+ | 1.09±0.06  | 1.00±0.08   | 1.13±0.14  | 0.92±0.12   |
| 42–43 kDa           | 1.00    | 0.98±0.04  | 0.92±0.05   | 1.03±0.02   | 1.21±0.06* | 1.16±0.04   | 1.17±0.11  | 0.96±0.07   |

<sup>1</sup>Values shown are Means ± S.E.M for 5–6 independent experiments (for the 28 kDa band of Ser-262, n=3). Following frequently used nomenclature, 42 kDa=P0, 43 kDa=P1, 46 kDa=P2; 47 kDa=P3. Because some bands were difficult to measure separately due to their proximity, they were measured together.

<sup>2</sup>This band increases with alkaline phosphatase treatment.

\* P<0.05 compared with control. + P<0.05 compared with same stimulated without inhibitor. # P<0.05 compared with NP-UAEC.
